# Supplementary material for: EMUDRA: Ensemble of Multiple Drug Repositioning Approaches to improve prediction accuracy
Source: Oxford University Press journal article supplement (doi:10.1093/bioinformatics/bty325), 2018-04-20
Supplement: bioinformatics_34_18_3151_s6.pdf [file bioinformatics_34_18_3151_s6.pdf]

# Supplementary Materials

## EMUDRA: Ensemble of Multiple Drug Repositioning Approaches to Improve Prediction Accuracy

Xianxiao Zhou<sup>1,2</sup>, Minghui Wang<sup>1,2</sup>, Igor Katsyv<sup>1,2,3</sup>, Hanna Irie<sup>4,5</sup> and Bin Zhang<sup>1,2,5\*</sup>

<sup>1</sup>Department of Genetics and Genomic Sciences, Icahn School of Medicine at Mount Sinai, New York, NY, 10029. <sup>2</sup>Icahn Institute for Genomics and Multiscale Biology, Icahn School of Medicine at Mount Sinai, New York, NY, 10029. <sup>3</sup>Medical Scientist Training Program, Icahn School of Medicine at Mount Sinai, New York, NY, 10029. <sup>4</sup>Division of Hematology and Medical Oncology, Department of Medicine, Icahn School of Medicine at Mount Sinai, New York, NY, 10029. <sup>5</sup>Department of Oncological Sciences, Tisch Cancer Institute, Icahn School of Medicine at Mount Sinai, New York, NY, 10029.

\*Correspondence:

Bin Zhang, PhD.

Professor

Department of Genetics & Genomic Sciences

Icahn School of Medicine at Mount Sinai

1470 Madison Avenue, Room S8-111, New York, NY 10029

(Phone) 212-824-8947 (Fax) 646-537-8660

Email: [bin.zhang@mssm.edu](mailto:bin.zhang@mssm.edu) or [zhangb@hotmail.com](mailto:zhangb@hotmail.com)

## **Supplementary Results**

**Normality of Matching Scores**

**Application of EMUDRA to Ovarian Cancer**

**Availability of Additional Data and Scripts**

## **Supplementary Tables**

**Table S1. Composition scores for the 247 ensemble and 8 non-ensemble methods**

**Table S2. The top 20 drugs for ovarian cancer predicted by EMUDRA**

## **Supplementary Figures**

**Figure S1. Receiver operator characteristic (ROC) curves and partial area under the curve (pAUC) of the 9 methods in simulations.**

**Figure S2. ROC curves and whole AUC of the 9 methods in simulations.**

**Figure S3. ROC curves and partial AUC of simulations with higher noise.**

**Figure S4. ROC curve and partial AUC of the 9 methods in independent data sets.**

**Figure S5. ROC curve and whole AUC of the 9 methods in independent data sets.**

**Figure S6. Distributions of p-values from normality tests of random signatures and distributions of scores.**

## **Supplementary Data**

**Images used to generate Figure 5B.**

## Supplementary Results

### Normality of Matching Scores

We tested the normality of the distribution of each of 4 sets of scores from 4 non-ensemble methods composing EMUDRA. We first tested distributions of enrichment scores calculated from random signatures. Each random signature was comprised of 5,000 genes randomly sampled from all the genes profiled in CMap, while gene expression changes (logFC) were randomly generated from a uniform distribution  $U[-1, 1]$ . Enrichment scores from each method were then compared to a normal distribution with their mean and standard deviation using K-S test. A total of 100 random signatures were tested. As shown in Figure S6A, most of score lists calculated from the 100 random signatures followed normal distribution with p-value  $> 0.05$ . Specifically, only 1, 4, 0 and 4 of the 100 signatures showed a non-normal distribution (i.e.  $p \leq 0.05$ ) for Cosine, XCor, XSpe and EWCos methods, respectively. These results indicated that enrichment scores of random signatures followed normal distribution (a typical example shown in Fig. S6B). Next, we tested normality of the scores calculated from the TNBC signature. As expected, those scores did not follow normal distributions as a few drugs reversed the TNBC signature, which formed long tails at the negative parts of the distributions (Fig. S6C). However, after excluding enrichment scores less than -0.06, the remaining scores followed normal distributions (Fig. S6D). These results supported our assumption that matching scores of the 4 methods would follow normal distribution except those scores from drugs that matched (reversed/enhanced) with query signature.

### Application of EMUDRA to Ovarian Cancer

We further applied EMUDRA to ovarian cancer. We first identified the genes differentially expressed between the stage IV ovarian cancer samples (distant metastasis) and the stage I-III samples (without distant metastasis) in the TCGA cohort. This signature included 114 up-regulated and 109 down-regulated genes in stage IV ovarian cancer. Table S2 shows the top 20 drugs predicted by EMUDRA. Fifteen of the top 20 drugs have known anticancer effects, such as apoptosis, cell cycle arrest and suppress cancer cell growth, suggesting that the top drugs have potential effects on suppressing ovarian cancer growth, aggression and metastasis. Among these drugs, only ciclopirox is in the top 20 drugs previously identified for the triple negative breast cancer, indicating EMUDRA adapts to input signatures of interest.

### Availability of Additional Data and Scripts

The data and script for making Figures 2-4 are available from the Synapse (<https://www.synapse.org/#!/Synapse:syn11038303>).

# Supplementary Tables

**Table S1. Composition scores for the 247 ensemble and 8 non-ensemble methods.**

| Ensemble                          | Composit e.Score | Ensemble                         | Composit e.Score | Ensemble                        | Composit e.Score |
|-----------------------------------|------------------|----------------------------------|------------------|---------------------------------|------------------|
| Cos.XCor.XSpe.EWCos (EMUDRA)      | 0.479638         | Cos.XSum.XSpe.WSS                | 0.037747         | XCos.XCor.EWCos.KS              | 5.02E-13         |
| Cos.XCos.XCor.XSpe.EWCos.WSS      | 0.442958         | XSum.XCos.EWCos.WSS              | 0.036908         | XCor.XSpe.KS                    | 5.02E-13         |
| Cos.XCos.XSpe.EWCos               | 0.441615         | Cos.XSum.EWCos.WSS               | 0.03521          | XSum.XCor.EWCos.KS.WSS          | 4.88E-13         |
| Cos.XSpe.EWCos                    | 0.415415         | Cos.XSum.EWCos                   | 0.030451         | Cos.XSum.XCor.XSpe.KS.WSS       | 4.88E-13         |
| Cos.XCos.XCor.XSpe.EWCos.WSS      | 0.412619         | Cos.XSum.XCor                    | 0.029668         | XCor.XSpe.EWCos.KS              | 4.83E-13         |
| Cos.XCor.XSpe.EWCos.WSS           | 0.404975         | Cos.XSum.XSpe                    | 0.025822         | Cos.XCos.XCor.XSpe.KS.WSS       | 4.82E-13         |
| Cos.XCos.XCor.XSpe.EWCos          | 0.391374         | XSum.XCos.XCor.XSpe              | 0.025749         | Cos.XCor.XSpe.EWCos.KS          | 4.64E-13         |
| Cos.XCor.EWCos                    | 0.387216         | Cos.XSum.XCos                    | 0.025223         | XCos.XCor.XSpe.KS.WSS           | 4.56E-13         |
| Cos.XCos.XSpe.EWCos.WSS           | 0.380861         | XSum.XCor.EWCos                  | 0.025127         | XSum.XCor.KS.WSS                | 4.50E-13         |
| Cos.XCos.XCor.EWCos               | 0.354182         | XSum.XCos.XCor.WSS               | 0.023669         | Cos.XSum.XCor.EWCos.KS.WSS      | 4.43E-13         |
| Cos.XCor.EWCos.WSS                | 0.328538         | XSum.XCos.EWCos                  | 0.02301          | Cos.XCor.XSpe.KS                | 4.40E-13         |
| Cos.XCor.EWCos                    | 0.305494         | XSum.XCor.XSpe.WSS               | 0.022735         | Cos.XCos.XCor.XSpe.EWCos.KS.WSS | 4.39E-13         |
| Cos.XSpe.EWCos.WSS                | 0.297396         | XSum.XSpe.EWCos.WSS              | 0.022026         | XCos.XCor.XSpe.EWCos.KS.WSS     | 4.35E-13         |
| Cos.XSpe                          | 0.283303         | XSum.XCos.XSpe.WSS               | 0.020461         | Cos.XSum.XCor.KS.WSS            | 4.29E-13         |
| Cos.XSum.XCos.XCor.XSpe.EWCos.WSS | 0.282022         | XCos.XCor                        | 0.019251         | Cos.XSum.XSpe.EWCos.KS          | 4.05E-13         |
| Cos.XCos.EWCos.WSS                | 0.280198         | XSum.XSpe.EWCos                  | 0.015053         | XSum.XCos.XSpe.EWCos.KS.WSS     | 4.00E-13         |
| XCos.XCor.XSpe.EWCos.WSS          | 0.258072         | XSum.XCor.XSpe                   | 0.014159         | Cos.XSum.XCos.XSpe.EWCos.KS.WSS | 3.86E-13         |
| Cos.XSum.XCor.XSpe.EWCos.WSS      | 0.255655         | XSum.XCos.XCor                   | 0.013057         | XSum.XSpe.EWCos.KS              | 3.79E-13         |
| Cos.XCor.XSpe.WSS                 | 0.253148         | XSum.XCos.XSpe                   | 0.01252          | XSum.XCos.EWCos.KS.WSS          | 3.54E-13         |
| Cos.XCos.XCor.XSpe.WSS            | 0.243792         | XCor.WSS                         | 0.011603         | Cos.XSum.XCos.XSpe.KS.WSS       | 3.40E-13         |
| Cos.XSum.XCos.XCor.EWCos.WSS      | 0.242628         | XCos.WSS                         | 0.010951         | XSum.XCos.XSpe.KS.WSS           | 3.34E-13         |
| XCor.XSpe.EWCos.WSS               | 0.241665         | XSum.XCor.WSS                    | 0.009483         | XSum.EWCos.KS                   | 3.28E-13         |
| Cos.XSum.XCos.XSpe.EWCos.WSS      | 0.235064         | Cos.WSS                          | 0.007194         | Cos.XSum.XCos.EWCos.KS.WSS      | 3.25E-13         |
| Cos.XCor.XSpe                     | 0.234406         | XSum.XCos.WSS                    | 0.006663         | XCos.XCor.EWCos.KS.WSS          | 3.20E-13         |
| XCor.XSpe.EWCos                   | 0.228843         | XSum.XCor                        | 0.005727         | XCos.XSpe.KS                    | 3.13E-13         |
| XCos.XSpe.EWCos                   | 0.227075         | XSpe.WSS                         | 0.005663         | Cos.XCos.XCor.EWCos.KS.WSS      | 3.12E-13         |
| XCos.XSpe.EWCos.WSS               | 0.2241           | XSum.XCos                        | 0.004724         | Cos.XCos.XSpe.EWCos.KS          | 3.08E-13         |
| Cos.XCos.XSpe.WSS                 | 0.223103         | Cos.XSum.WSS                     | 0.004572         | Cos.XSum.EWCos.KS               | 3.08E-13         |
| Cos.XCor                          | 0.208147         | Cos.XSum                         | 0.003908         | Cos.XCos.XSpe.KS                | 3.06E-13         |
| Cos.XSum.XCos.XCor.XSpe.EWCos     | 0.205838         | XSum.XSpe.WSS                    | 0.002768         | XCos.XSpe.EWCos.KS              | 2.97E-13         |
| XCos.XCor.EWCos.WSS               | 0.20539          | XSum.XSpe                        | 0.002243         | XSum.XCos.KS.WSS                | 2.97E-13         |
| Cos.XCos.XSpe                     | 0.202481         | XSum.EWCos.WSS                   | 0.002128         | Cos.XSum.XSpe.KS                | 2.96E-13         |
| XSpe.EWCos                        | 0.199096         | XSum.EWCos                       | 0.001514         | Cos.XSum.XCos.KS.WSS            | 2.89E-13         |
| Cos.XSum.XCor.XSpe.EWCos          | 0.19072          | EWCos.WSS                        | 0.000575         | Cos.XCos.XCor.KS.WSS            | 2.78E-13         |
| Cos.XCos.XCor.WSS                 | 0.187936         | XSum.WSS                         | 0.00039          | XCos.XCor.KS.WSS                | 2.70E-13         |
| Cos.XSum.XCor.EWCos.WSS           | 0.181113         | XSpe                             | 4.62E-05         | Cos.XCor.KS                     | 2.60E-13         |
| XCos.XCor.XSpe.EWCos              | 0.178179         | XCor                             | 4.30E-05         | XCor.EWCos.KS                   | 2.55E-13         |
| Cos.XSum.XCos.XSpe.EWCos          | 0.174028         | Cosine                           | 1.63E-05         | Cos.XCor.EWCos.KS               | 2.52E-13         |
| Cos.XSum.XCos.XCor.EWCos          | 0.168451         | XCos                             | 5.02E-06         | XCor.KS                         | 2.45E-13         |
| Cos.XSum.XCos.EWCos.WSS           | 0.165931         | EWCos                            | 2.34E-06         | XSum.XSpe.EWCos.KS.WSS          | 2.45E-13         |
| Cos.XCos                          | 0.159098         | XSum                             | 3.63E-07         | Cos.XSum.XSpe.EWCos.KS.WSS      | 2.39E-13         |
| XCor.EWCos                        | 0.156394         | KS                               | 3.46E-07         | Cos.XSum.KS                     | 2.31E-13         |
| Cos.XSum.XSpe.EWCos.WSS           | 0.149852         | WSS                              | 2.86E-07         | XSum.XSpe.KS                    | 2.22E-13         |
| Cos.XCos.XCor.XSpe                | 0.148278         | XSum.XCos.XCor.XSpe.KS           | 1.14E-12         | Cos.XSum.XSpe.KS.WSS            | 1.88E-13         |
| Cos.XCor.WSS                      | 0.136663         | XSum.XCos.XCor.KS                | 1.10E-12         | Cos.XSum.EWCos.KS.WSS           | 1.81E-13         |
| Cos.XSum.XCor.EWCos               | 0.131166         | Cos.XSum.XCos.XCor.XSpe.KS       | 1.09E-12         | Cos.XCor.XSpe.KS.WSS            | 1.81E-13         |
| XSum.XCos.XCor.XSpe.EWCos.WSS     | 0.129586         | XSum.XCos.XCor.XSpe.EWCos.KS     | 1.08E-12         | Cos.XCor.XSpe.EWCos.KS.WSS      | 1.67E-13         |
| Cos.XSum.XCos.XCor.XSpe.WSS       | 0.129351         | Cos.XSum.XCos.XCor.KS            | 1.04E-12         | Cos.XCos.EWCos.KS               | 1.59E-13         |
| XCos.XCor.EWCos                   | 0.124327         | XSum.XCos.XCor.EWCos.KS          | 1.03E-12         | XSum.XSpe.KS.WSS                | 1.55E-13         |
| XCos.EWCos                        | 0.120184         | Cos.XSum.XCos.XCor.XSpe.EWCos.KS | 9.92E-13         | XSum.EWCos.KS.WSS               | 1.55E-13         |
| Cos.XSum.XSpe.EWCos               | 0.119321         | Cos.XSum.XCos.XCor.EWCos.KS      | 9.66E-13         | Cos.XCos.KS                     | 1.49E-13         |
| Cos.XSum.XCos.EWCos               | 0.110398         | XSum.XCor.XSpe.EWCos.KS          | 9.28E-13         | XCor.XSpe.EWCos.KS.WSS          | 1.47E-13         |
| Cos.XCos.XCor                     | 0.11011          | XSum.XCos.XCor.XSpe.KS.WSS       | 8.76E-13         | XSum.KS                         | 1.42E-13         |
| Cos.XCos.WSS                      | 0.107638         | Cos.XSum.XCor.XSpe.EWCos.KS      | 8.55E-13         | XCos.EWCos.KS                   | 1.34E-13         |
| Cos.XSpe.WSS                      | 0.101884         | XSum.XCor.XSpe.KS                | 8.40E-13         | Cos.XCos.XSpe.EWCos.KS.WSS      | 1.32E-13         |
| XCor.EWCos.WSS                    | 0.101805         | Cos.XSum.XCor.XSpe.KS            | 8.33E-13         | XCor.XSpe.KS.WSS                | 1.31E-13         |
| Cos.XSum.XCor.XSpe.WSS            | 0.097483         | XSum.XCor.EWCos.KS               | 8.26E-13         | Cos.XSum.KS.WSS                 | 1.30E-13         |
| XSum.XCor.XSpe.EWCos.WSS          | 0.094811         | XSum.XCos.XCor.XSpe.EWCos.KS.WSS | 7.73E-13         | Cos.XCos.XSpe.KS.WSS            | 1.12E-13         |
| Cos.XSum.XCos.XSpe.WSS            | 0.089156         | Cos.XSum.XCor.EWCos.KS           | 7.52E-13         | XCos.XSpe.EWCos.KS.WSS          | 1.01E-13         |
| XSum.XCos.XCor.EWCos.WSS          | 0.088869         | Cos.XSum.XCor.KS                 | 7.50E-13         | XSum.KS.WSS                     | 9.50E-14         |
| Cos.XSum.XCos.XCor.WSS            | 0.087933         | XCos.XCor.XSpe.KS                | 7.49E-13         | XCos.KS                         | 9.22E-14         |
| Cos.EWCos                         | 0.086141         | Cos.XSum.XCos.XCor.XSpe.KS.WSS   | 7.36E-13         | Cos.XCor.EWCos.KS.WSS           | 8.95E-14         |
| XCos.EWCos.WSS                    | 0.085832         | XSum.XCos.XCor.KS.WSS            | 7.31E-13         | XCos.XSpe.KS.WSS                | 8.03E-14         |
| XSum.XCos.XSpe.EWCos.WSS          | 0.085405         | XSum.XCos.XSpe.EWCos.KS          | 7.17E-13         | Cos.XCor.KS.WSS                 | 7.05E-14         |
| XSpe.EWCos.WSS                    | 0.084821         | XSum.XCos.XCor.EWCos.KS.WSS      | 7.13E-13         | Cos.XSpe.EWCos.KS               | 6.72E-14         |

**Table S1. Composition scores for the 247 ensemble and 8 non-ensemble methods. (Continued)**

| Ensemble                  | Composit e.Score | Ensemble                        | Composit e.Score | Ensemble              | Composit e.Score |
|---------------------------|------------------|---------------------------------|------------------|-----------------------|------------------|
| XSum.XCos.XCor.XSpe.EWCos | 0.083244         | CombnAll8Scores                 | 7.08E-13         | XCor.EWCos.KS.WSS     | 6.11E-14         |
| XCos.XCor.XSpe.WSS        | 0.079339         | XSum.XCor.KS                    | 6.92E-13         | Cos.XCos.EWCos.KS.WSS | 5.75E-14         |
| Cos.XSum.XCos.XCor.XSpe   | 0.078543         | Cos.XSum.XCos.XSpe.EWCos.KS     | 6.77E-13         | Cos.XCos.KS.WSS       | 4.13E-14         |
| Cos.XSum.XCor.XSpe        | 0.057925         | Cos.XCos.XCor.XSpe.KS           | 6.41E-13         | XSpe.EWCos.KS         | 3.98E-14         |
| XSum.XCor.XSpe.EWCos      | 0.057257         | XCos.XCor.KS                    | 6.33E-13         | Cos.XSpe.KS           | 3.96E-14         |
| Cos.XSum.XCos.XSpe        | 0.052562         | XSum.XCos.XSpe.KS               | 6.24E-13         | XCos.EWCos.KS.WSS     | 3.59E-14         |
| XSum.XCos.XSpe.EWCos      | 0.051643         | XCos.XCor.XSpe.EWCos.KS         | 6.19E-13         | XCor.KS.WSS           | 3.36E-14         |
| Cos.XSum.XCor.WSS         | 0.051379         | Cos.XSum.XCos.XCor.EWCos.KS.WSS | 6.18E-13         | Cos.XSpe.EWCos.KS.WSS | 2.85E-14         |
| XSum.XCos.XCor.EWCos      | 0.051273         | Cos.XSum.XCos.XSpe.KS           | 6.18E-13         | XCos.KS.WSS           | 2.12E-14         |
| Cos.XSum.XCos.XCor        | 0.051069         | Cos.XSum.XCos.XCor.KS.WSS       | 6.13E-13         | Cos.EWCos.KS          | 1.91E-14         |
| XCor.XSpe.WSS             | 0.050402         | Cos.XCos.XCor.XSpe.EWCos.KS     | 6.11E-13         | Cos.XSpe.KS.WSS       | 1.89E-14         |
| Cos.EWCos.WSS             | 0.048199         | XSum.XCos.EWCos.KS              | 6.06E-13         | XSpe.EWCos.KS.WSS     | 1.70E-14         |
| XCos.XSpe.WSS             | 0.047699         | Cos.XSum.XCos.EWCos.KS          | 5.76E-13         | XSpe.KS               | 1.57E-14         |
| Cos.XSum.XCos.WSS         | 0.044673         | Cos.XSum.XCos.KS                | 5.51E-13         | Cos.EWCos.KS.WSS      | 1.15E-14         |
| XCos.XSpe                 | 0.044441         | XSum.XCor.XSpe.EWCos.KS.WSS     | 5.44E-13         | XSpe.KS.WSS           | 1.04E-14         |
| XSum.XCor.EWCos.WSS       | 0.043522         | XSum.XCos.KS                    | 5.29E-13         | Cos.KS                | 7.66E-15         |
| XSum.XCos.XCor.XSpe.WSS   | 0.042927         | Cos.XCos.XCor.KS                | 5.23E-13         | EWCos.KS              | 5.84E-15         |
| XCor.XSpe                 | 0.041818         | Cos.XCos.XCor.EWCos.KS          | 5.18E-13         | Cos.KS.WSS            | 5.66E-15         |
| XCos.XCor.WSS             | 0.038536         | XSum.XCor.XSpe.KS.WSS           | 5.13E-13         | EWCos.KS.WSS          | 4.13E-15         |
| XCos.XCor.XSpe            | 0.038147         | Cos.XSum.XCor.XSpe.EWCos.KS.WSS | 5.13E-13         | KS.WSS                | 1.24E-15         |

**Table S2. Top 20 drugs targeting ovarian cancer by EMUDRA**

| Drug               | Score    | Known Effects                     | Evidence type | Reference                  |
|--------------------|----------|-----------------------------------|---------------|----------------------------|
| ciclopirox         | -6.74303 | Inhibit cell proliferation        | direct        | (Shen, et al., 2017)       |
| gossypol           | -6.33088 | Induce apoptosis                  | indirect      | (Volate, et al., 2010)     |
| perhexiline        | -6.30989 | Inhibit tumor growth              | direct        | (Ren, et al., 2015)        |
| monensin           | -6.29086 | Cell cycle arrest and apoptosis   | direct        | (Park, et al., 2003)       |
| 5182598            | -6.08998 | Novel prediction                  | unclear       | None                       |
| phenoxybenzamine   | -5.70601 | Novel prediction                  | unclear       | None                       |
| MG-132             | -5.67589 | Induce autophagy                  | indirect      | (Bao, et al., 2016)        |
| clofilium tosylate | -5.62421 | Induce apoptosis with pazopanib   | direct        | (Chauvin, et al., 2017)    |
| pararosaniline     | -5.5809  | Novel prediction                  | unclear       | None                       |
| thioridazine       | -5.26889 | Induce apoptosis                  | indirect      | (Kang, et al., 2012)       |
| clomipramine       | -5.14264 | Induce apoptosis                  | indirect      | (Xia, et al., 1999)        |
| rescinamine        | -5.10425 | Induce apoptosis                  | indirect      | (AbdelHafez, et al., 2013) |
| dyclonine          | -5.06724 | Enhance cytotoxic effect          | indirect      | (Ju, et al., 2009)         |
| pimethixene        | -4.832   | Novel prediction                  | unclear       | None                       |
| clofazimine        | -4.77852 | Inhibit cancer cell growth        | direct        | (Koval, et al., 2014)      |
| niclosamide        | -4.76828 | Suppress cancer cell growth       | direct        | (Lu, et al., 2011)         |
| triamterene        | -4.72708 | Selective tumor cell cytotoxicity | direct        | (Guillot, et al., 2017)    |
| withaferin A       | -4.71359 | Kills cancer cells                | direct        | (Yu, et al., 2017)         |
| clioquinol         | -4.5358  | Reduced cancer cell viability     | direct        | (Ding, et al., 2005)       |
| 5151277            | -4.5082  | Novel prediction                  | unclear       | None                       |

## Supplementary Figures

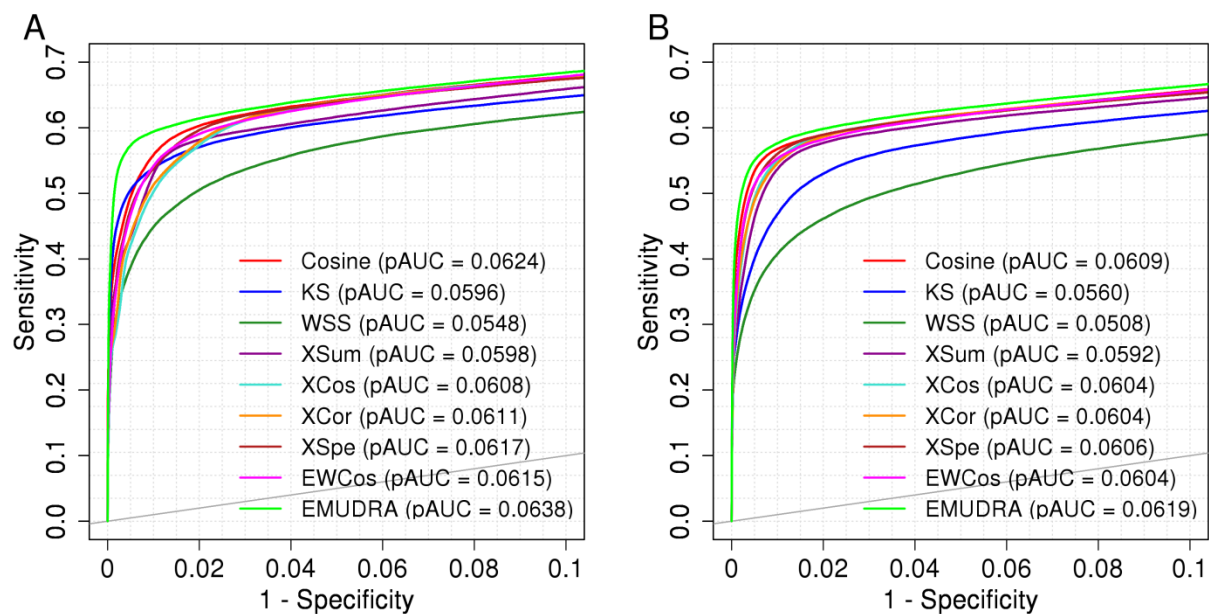

**Figure S1. Receiver operator characteristic (ROC) curves and partial area under the curve (pAUC) of the 9 methods in the simulation studies. (A)** Drug-induced signatures were identified from drug-treated and vehicle-treated gene expression profiles for each instance in the CMap. Those signatures were used as query signatures to calculate scores for each method. Instances treated with a same drug of a query signature were taken as positive cases while the other instances were set as negative cases for plotting ROC curves and assessing AUC of false positive rate less than 0.1. **(B)** Partial ROC and AUC of signatures identified from the CMap gene expression profiles with adding random noise from a uniform distribution.

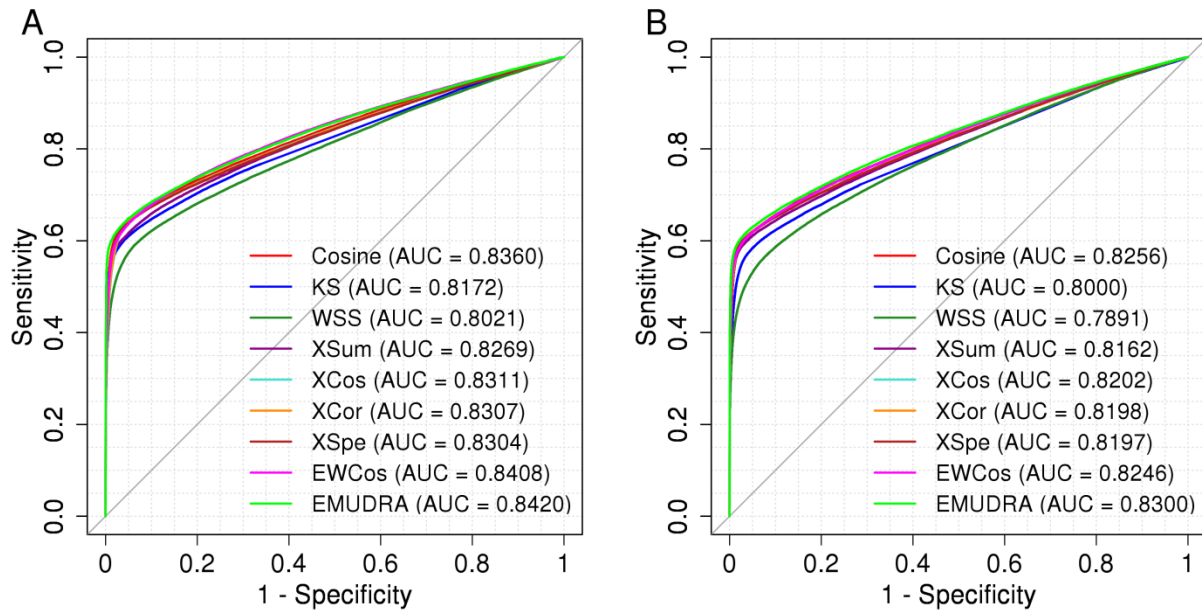

**Figure S2. ROC curves and whole AUC of the 9 methods in simulations. (A)** Drug-induced signatures were identified from drug-treated and vehicle-treated gene expression profiles for each instance in the CMap. Those signatures were used as query signatures to calculate scores for each method. Instances treated with a same drug of a query signature were set as positive cases and other instances were set as negative cases for plotting ROC curves and assessing the AUC. **(B)** ROC and AUC of signatures identified from the CMap gene expression profiles with adding random noise from a uniform distribution.

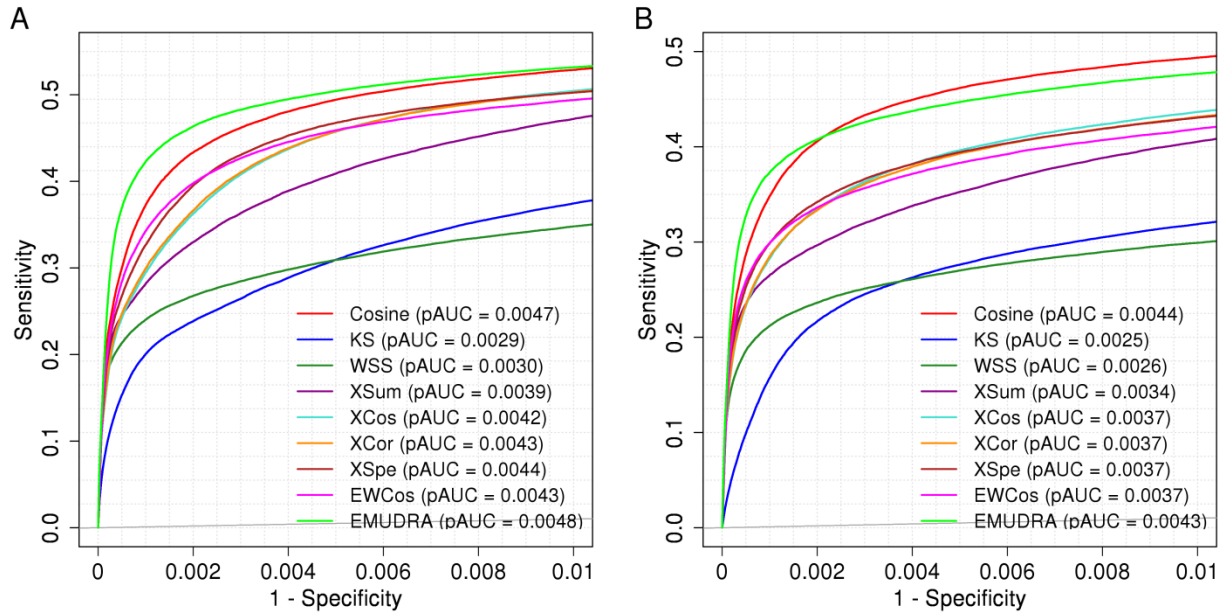

**Figure S3. ROC curves and partial AUC of simulations with higher noise.** (A) Random noise ( $s = 0.5$ ) from a uniform distribution was added to the CMap gene expression profiles to identify query signatures. Those signatures were used as query signatures to calculate scores for each method. Instances treated with a same drug of a query signature were set as positive cases and other instances were set as negative cases for plotting ROC curves and assessing partial AUC of false positive rate less than 0.01. (B) pROC and pAUC of  $s = 0.8$

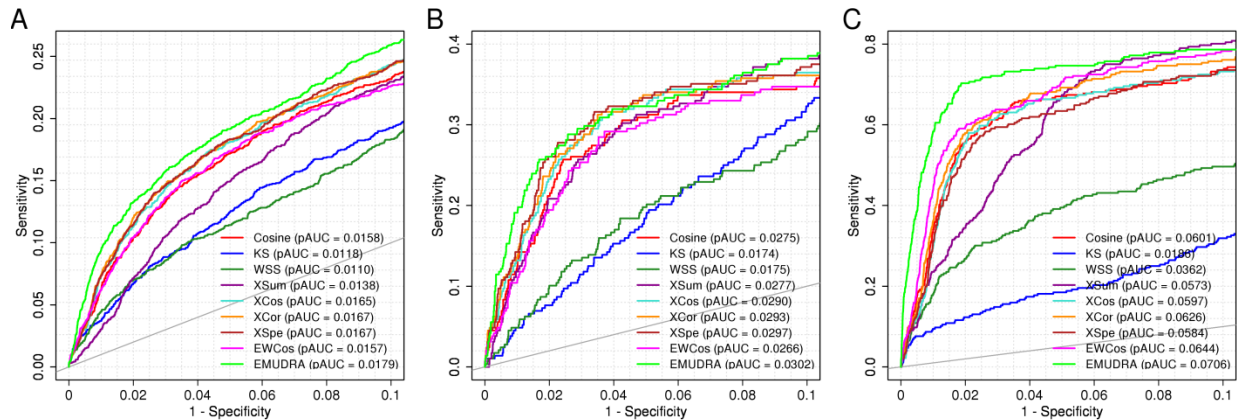

**Figure S4. ROC curve and partial AUC of the 9 methods in independent data sets.** (A) ROC curves and pAUC of predicting drug pairs sharing at least 1 ATC code. Drug pairs sharing at least 1 ATC level 4 codes were used as positive cases and other drug pairs between those drugs were set as negative cases. Drug-induced signatures identified from the CMap were used as query signatures to calculate scores of drug pairs for each method. The positive and negative cases as well as scores were then used to generate ROC curves and evaluate pAUC of the 9 methods with FPR less than 0.1. (B) Predicting drug pairs sharing at least 2 ATC codes. (C) ROC curves and pAUC of the LINCS validation data set. Drug-induced signatures were identified from the LINCS data set and used to calculate scores. Instances treated with the same drug of a signature were used as positive cases and other instances were used as negative cases to generate ROC curves and calculate pAUC with FPR less than 0.1.



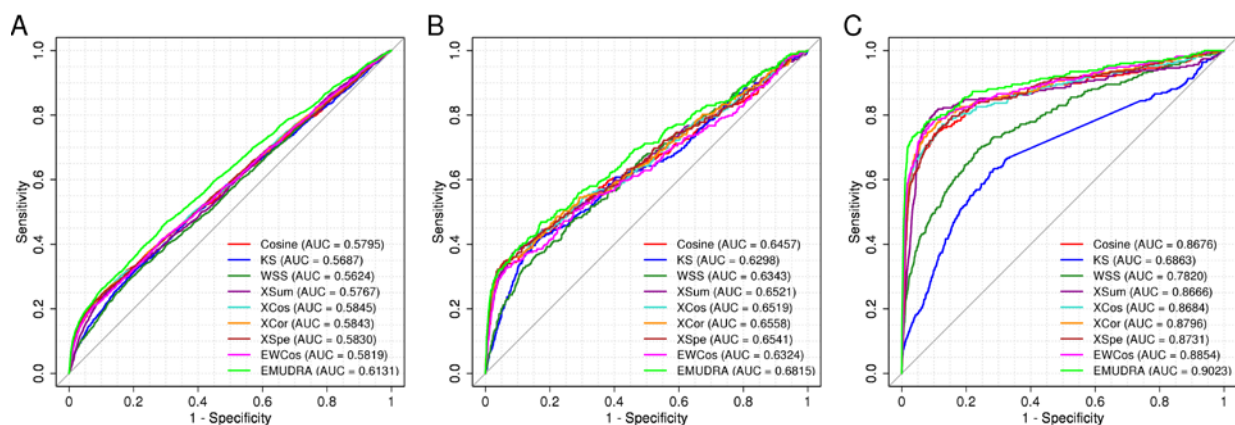

**Figure S5. ROC curves and whole AUC of 9 methods tested in the independent data sets.** (A) ROC curves and AUC of predicting drug pairs sharing at least 1 ATC code. Drug pairs sharing at least 1 ATC level 4 codes were used as positive cases and other drug pairs among those drugs were set as negative cases. Drug-induced signatures identified from CMap were used as query signatures to calculate matching scores of drug pairs using each method. The positive and negative cases as well as scores were then used to generate ROC curves and estimate AUC. (B) Predicting drug pairs sharing at least 2 ATC codes. (C) ROC curves and AUC of the LINCS validation data set. Drug-induced signatures were identified from the LINCS data set and used to calculate scores. Instances treated with the same drug of a signature were used as positive cases and other instances were used as negative cases to generate ROC curves and calculate AUC.

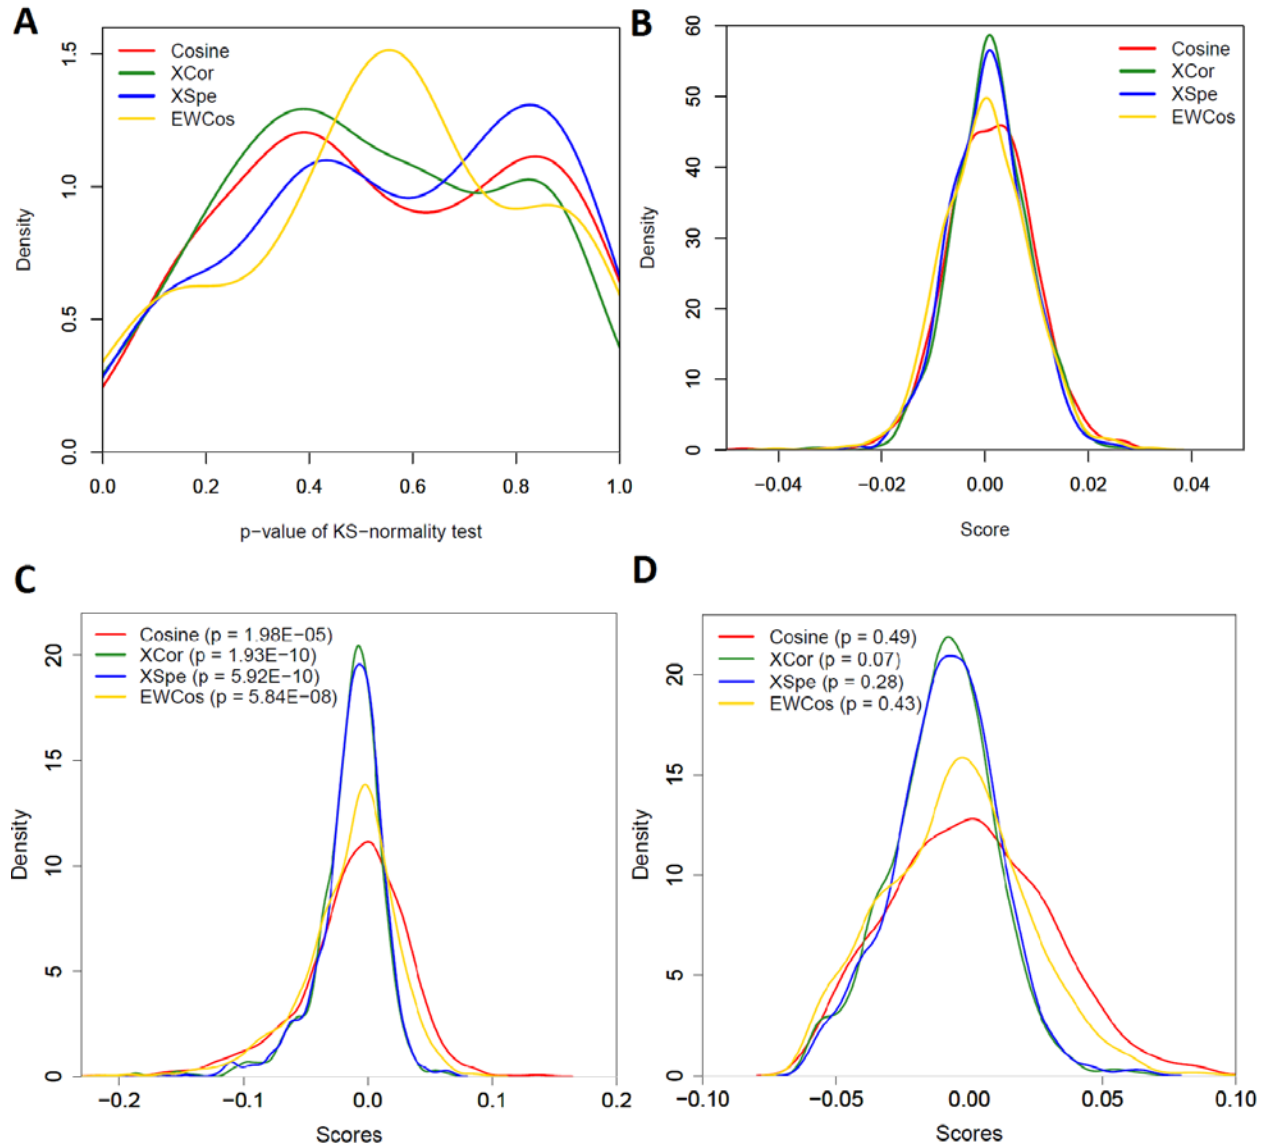

**Figure S6. Distributions of p-values from normality tests of random signatures and distributions of matching scores from the four methods composing EMUDRA.** (A) Distributions of p-values from normality tests of Cosine, XCor, XSpe and EWCos scores calculated from random signatures. (B) Distributions of Cosine, XCor, XSpe and EWCos scores from a random signature. (C) Distributions of Cosine, XCor, XSpe and EWCos scores from the triple negative breast cancer signature. The p-values were calculated by comparing scores of each method with standard normal distribution using the K-S test. (D) Distributions of Cosine, XCor, XSpe and EWCos scores from the triple negative breast cancer signature without scores  $< -0.06$ . The p-values were calculated by comparing scores of each method with standard normal distribution using the K-S test.

## Reference

- AbdelHafez, E.M., *et al.* Computational and synthetic studies towards improving rescinnamine as an inducer of MSH2-dependent apoptosis in cancer treatment. *Mol Cancer Biol* 2013;1(1).
- Bao, W., *et al.* Induction of autophagy by the MG132 proteasome inhibitor is associated with endoplasmic reticulum stress in MCF7 cells. *Mol Med Rep* 2016;13(1):796-804.
- Chauvin, C., *et al.* High-Throughput Drug Screening Identifies Pazopanib and Clofilium Tosylate as Promising Treatments for Malignant Rhabdoid Tumors. *Cell Rep* 2017;21(7):1737-1745.
- Ding, W.Q., *et al.* Anticancer activity of the antibiotic clioquinol. *Cancer Res* 2005;65(8):3389-3395.
- Guillotin, D., *et al.* Drug-Repositioning Screens Identify Triamterene as a Selective Drug for the Treatment of DNA Mismatch Repair Deficient Cells. *Clin Cancer Res* 2017;23(11):2880-2890.
- Ju, D., Wang, X. and Xie, Y. Dyclonine and alverine citrate enhance the cytotoxic effects of proteasome inhibitor MG132 on breast cancer cells. *Int J Mol Med* 2009;23(2):205-209.
- Kang, S., *et al.* Thioridazine induces apoptosis by targeting the PI3K/Akt/mTOR pathway in cervical and endometrial cancer cells. *Apoptosis* 2012;17(9):989-997.
- Koval, A.V., *et al.* Anti-leprosy drug clofazimine inhibits growth of triple-negative breast cancer cells via inhibition of canonical Wnt signaling. *Biochem Pharmacol* 2014;87(4):571-578.
- Lu, W., *et al.* Niclosamide suppresses cancer cell growth by inducing Wnt co-receptor LRP6 degradation and inhibiting the Wnt/beta-catenin pathway. *PLoS One* 2011;6(12):e29290.
- Park, W.H., *et al.* Monensin-mediated growth inhibition of SNU-C1 colon cancer cells via cell cycle arrest and apoptosis. *Int J Oncol* 2003;22(2):377-382.
- Ren, X.R., *et al.* Perhexiline promotes HER3 ablation through receptor internalization and inhibits tumor growth. *Breast Cancer Res* 2015;17:20.
- Shen, T., *et al.* Ciclopirox inhibits cancer cell proliferation by suppression of Cdc25A. *Genes Cancer* 2017;8(3-4):505-516.
- Volate, S.R., *et al.* Gossypol induces apoptosis by activating p53 in prostate cancer cells and prostate tumor-initiating cells. *Mol Cancer Ther* 2010;9(2):461-470.
- Xia, Z., *et al.* The antidepressants imipramine, clomipramine, and citalopram induce apoptosis in human acute myeloid leukemia HL-60 cells via caspase-3 activation. *J Biochem Mol Toxicol* 1999;13(6):338-347.
- Yu, Y., *et al.* Withaferin-A kills cancer cells with and without telomerase: chemical, computational and experimental evidences. *Cell Death Dis* 2017;8(4):e2755.
